# Supplementary material
Source: PubMed Central journal article supplement (PMC4613473)
Supplement: ejhg201593x1.pdf [file ejhg201593x1.pdf]

**Arg<sup>1809</sup> substitution in neurofibromin: further evidence of a genotype-phenotype correlation in neurofibromatosis type 1.**

Claudia Santoro<sup>1</sup>, Anna Maietta<sup>1</sup>, Teresa Giugliano<sup>2</sup>, Daniela Melis<sup>3</sup>, Silverio Perrotta<sup>1</sup>, Vincenzo Nigro<sup>2,4</sup> and Giulio Piluso<sup>2,\*</sup>

<sup>1</sup>Dipartimento della Donna, del Bambino e di Chirurgia Generale e Specialistica, Seconda Università degli Studi di Napoli, Napoli, Italy.

<sup>2</sup>Dipartimento di Biochimica Biofisica e Patologia Generale, Seconda Università degli Studi di Napoli, Napoli, Italy.

<sup>3</sup>Dipartimento di Pediatria, Università degli Studi di Napoli “Federico II”, Napoli, Italy.

<sup>4</sup>Telethon Institute of Genetics and Medicine (TIGEM), Pozzuoli (NA), Italy.

\*Correspondence: Dr. Giulio Piluso, Dipartimento di Biochimica, Biofisica e Patologia Generale, Seconda Università degli Studi di Napoli, Via Luigi De Crechio, 7 – 80138 Napoli (Italy), Tel/Fax +390815665685, [giulio.piluso@unina2.it](mailto:giulio.piluso@unina2.it).

## Supplementary Information

**Supplementary Table 1** – Clinical features of the 16 patients from six families with different Arg<sup>1809</sup> substitutions.

| Clinical features                 | 5425C>T (Arg1809Cys) |               |              |               |                      |           |       |          |              |                  | 5426G>T (Arg1809Leu)         |                      |                              |          | 5426G>C (Arg1809Pro) | Total | Total (Pinna et al) |
|-----------------------------------|----------------------|---------------|--------------|---------------|----------------------|-----------|-------|----------|--------------|------------------|------------------------------|----------------------|------------------------------|----------|----------------------|-------|---------------------|
|                                   | Family 1             |               |              |               |                      | Family 2  |       | Family 3 |              |                  | Family 4                     |                      |                              | Family 5 | Family 6             |       |                     |
|                                   | II.4                 | II.6          | II.7         | III.4         | III.5                | II.3      | III.1 | III.3    | III.4        | IV.4             | II.2                         | III.1                | III.2                        |          |                      |       |                     |
| Age yrs (at the last examination) | 41                   | 39            | 32           | 13            | 11                   | 54        | 11    | 40       | 37           | 5                | 40                           | 5                    | 3                            | 15       | 12                   |       |                     |
| Sex                               | M                    | F             | M            | F             | M                    | F         | F     | F        | M            | M                | F                            | M                    | F                            | F        | F                    | 6M/9F | 5M/9F               |
| CALS                              | +                    | +             | +            | +             | +                    | +         | +     | +        | +            | +                | +                            | +                    | +                            | +        | +                    | 15/15 | 14/14               |
| Freckling                         | + (very mild)        | + (very mild) | -            | + (very mild) | + (very mild)        | +         | +     | NA       | -            | + (very mild)    | +                            | -                    | -                            | -        | -                    | 8/14  | 9/10                |
| Lisch nodules                     | -                    | -             | -            | -             | -                    | -         | -     | -        | -            | -                | -                            | -                    | -                            | -        | -                    | 0/15  | 0/10                |
| Cutaneous NF                      | -                    | -             | -            | -             | -                    | -         | -     | -        | -            | -                | -                            | -                    | -                            | -        | -                    | 0/15  | 0/13                |
| Subcutaneous NF                   | -                    | -             | -            | -             | -                    | -         | -     | -        | -            | -                | -                            | -                    | -                            | -        | -                    | 0/15  | 0/13                |
| External plexiform NF             | -                    | -             | -            | -             | -                    | -         | -     | -        | -            | -                | -                            | -                    | -                            | -        | -                    | 0/15  | 0/13                |
| Optic pathway glioma              | NA                   | -             | NA           | NA            | NA                   | NA        | -     | -        | NA           | -                | NA                           | NA                   | NA                           | NA       | -                    | 0/5   | 0/11                |
| Learning difficulties             | -                    | -             | -            | -             | -                    | -         | -     | -        | +            | -                | +                            | -                    | -                            | +        | -                    | 4/15  | 1/13                |
| Other neoplasias                  | -                    | -             | -            | -             | -                    | -         | -     | -        | -            | -                | -                            | -                    | -                            | -        | -                    | 0/15  | 0/11                |
| Short stature (≤-2 SD)            | -                    | -             | -            | -             | -                    | -         | -     | -        | -            | -                | -                            | -                    | -                            | -        | -                    | 0/15  | 1/10                |
| Macrocephaly                      | -                    | -             | +            | -             | + (relative)         | -         | -     | NA       | + (relative) | -                | +                            | +                    | +                            | -        | +                    | 7/14  | 2/10                |
| Thoracic anomalies                | -                    | PC            | PE           | PE            | PE, SW               | PE        | -     | NA       | PE           | -                | PE                           | -                    | -                            | -        | -                    | 7/14  | 3/11                |
| Scoliosis (non-dystrophic)        | -                    | -             | -            | +             | -                    | +         | +     | -        | -            | -                | -                            | -                    | -                            | +        | -                    | 4/15  | 2/10                |
| Pulmonary valve stenosis          | -                    | -             | NA           | -             | -                    | -         | -     | -        | -            | -                | -                            | -                    | -                            | -        | NA                   | 0/13  | 0/10                |
| Other cardiac defects             | NA                   | -             | NA           | ASD           | -                    | -         | -     | NA       | NA           | -                | NA                           | -                    | -                            | -        | NA                   | 1/8   | NA                  |
| Other NS features                 | SN, LSPH, WSN        | HD,SSDC       | SN, SPC, E   | -             | SN, SSDC, WSN        | SSDC      | SSDC  | NA       | SSDC         | -                | HD, LSPH, H, BNT, MJL, SSDC  | CF, S, SSDC, MJL, FF | H, BNT, T, SSDC, KK, MJL, FF | FF       | NA                   |       |                     |
| Lipomas                           | +                    | -             | +            | -             | -                    | +         | -     | NA       | +            | -                | +                            | -                    | -                            | -        | -                    | 5/14  | NA                  |
| Others                            | X, CMS, P            | X             | CMS, LLI, UH | -             | Na, Ma, FF, SRC, LRP | Piv, EDAA | Piv   | -        | X, Piv       | JIE, Ne, SuN, PP | CMS, D, EK, POF, SA, LLI, TD | TD, UH, SuN          | SA, AD, SuN                  | Ne, Pil  | O                    |       |                     |

**Abbreviations:** -, negative; +, positive; AD, abdominal diastasis; ASD, atrial septal defect; BNT, bulbous nasal tip; CF, coarse facies; CMS, Campbell de Morgan spots; D, dolichocolon; E, exophthalmos; EDAA, eating disorders in adult age; EK, ectopic kidney; F, female; FF, flat feet; H, hypertelorism; HD, hypokinetic dysphonia; JIE, juvenile idiopathic epilepsy; KK, knock knees; LLI, leg length inequality; LRP, lichen ruber planus; LSPH, low-set posterior hairline; M, male; Ma, malocclusion; MJL, mild joint laxity; NA, not available; Ne, nevus anemicus; NF, neurofibromas; O, osteopenia; P, psoriasis; PC, pectus carinatum; PE, pectus excavatum; Pil, pilomatrixoma; Piv, phototype IV; POF, premature ovarian failure; PP, postaxial polydactyly; S, scaphocephaly; SA, sacral appendix; SN, short neck; SPC, single palmar creases; SRC, single renal cyst; SSDC, soft skin-deep palm and sole creases; SuN, supernumerary nipples; SW, scapular winging; T, turriccephaly; TD, tooth decay; UH, umbilical hernia; WSN, wide-set nipples; X, xanthelasma.

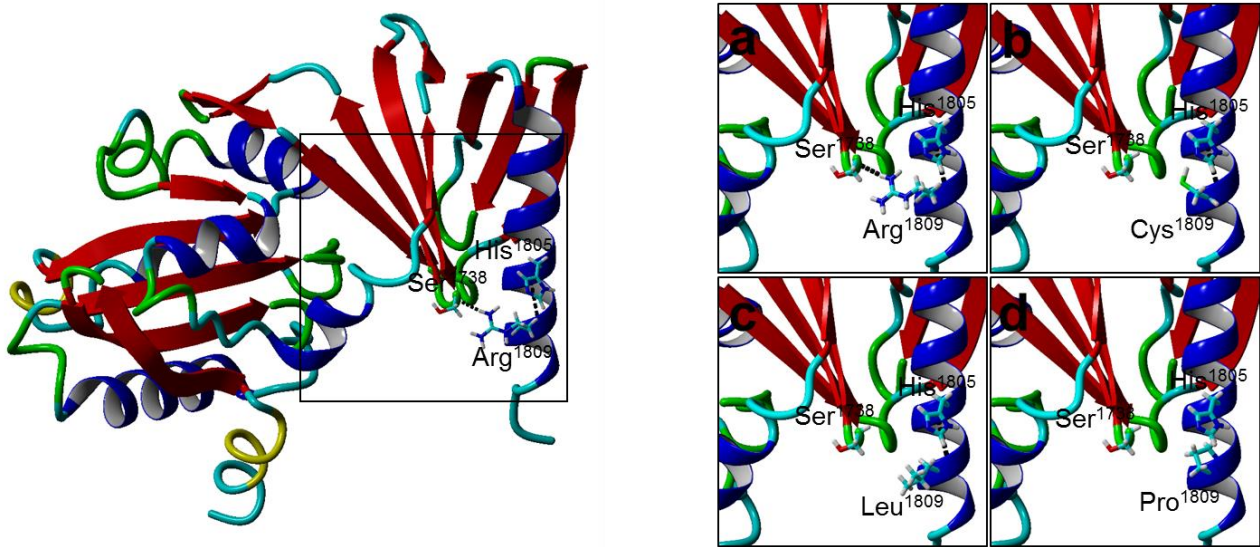

**Supplementary Figure S1 - 3D homology-modeling**

Sec/PH-like bipartite model (RefSeq: NP\_000258.1 residues 1560-1816; RCS-PDB: 2Q4D) was generated for wild-type (left) and mutant forms. The zoomed boxes (right) highlight H-bonds involving the residue at position 1809: (a) the wild-type Arg<sup>1809</sup> forms H-bonds with Ser<sup>1738</sup> and His<sup>1805</sup>. H-bond with Ser<sup>1738</sup> is lost with Cys<sup>1809</sup> (b) or Leu<sup>1809</sup> (c) substitutions, while both H-bonds are lost with Pro<sup>1809</sup> substitution (d).
